# Supplementary material
Source: publisher figshare collection journal article supplement (https://frontiersin.figshare.com/ndownloader/files/13663409)
Supplement: Supplementary file [file 13663409]

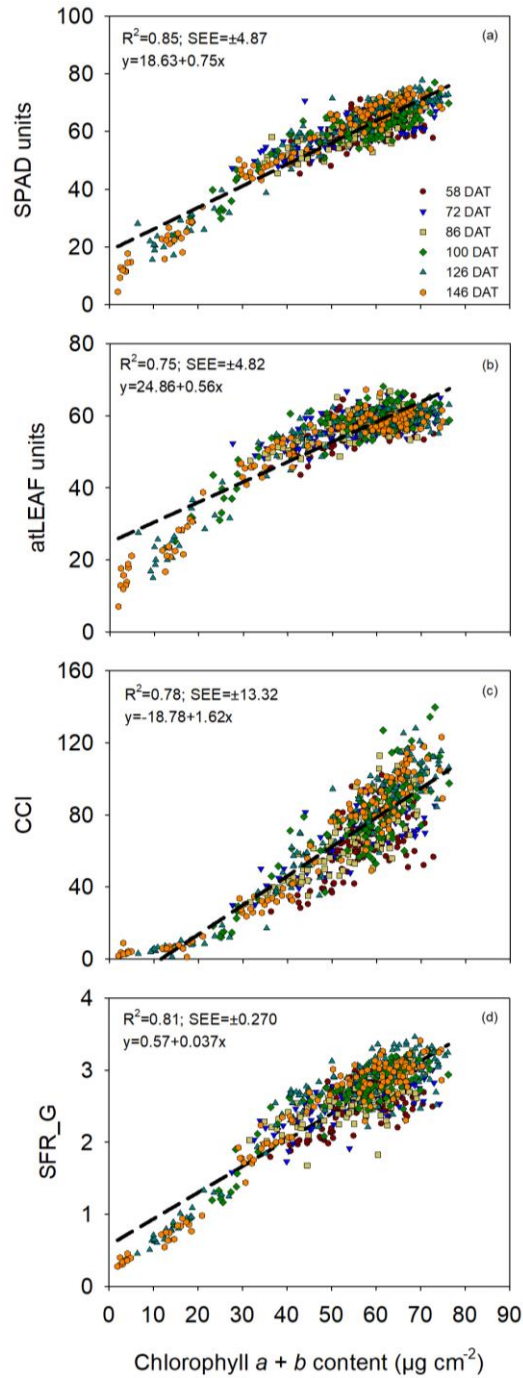

Figure S1. Linear relationship between chlorophyll *a* + *b* content ( $\mu\text{g cm}^{-2}$ ) and different chlorophyll meter measurements. The coefficient of determination ( $R^2$ ) and standard error of the estimate ( $\pm\text{SEE}$ ) values, and the equation of the regression are shown (solid lines). CCI is chlorophyll content index, measured with the MC-100 meter; SFR\_G is Simple Fluorescence Ratio under Green excitation, measured with the Multiplex sensor.
